# Supplementary material for: Structural basis for molecular assembly of fucoxanthin chlorophyll a/c-binding proteins in a diatom photosystem I supercomplex
Source: eLife journal article supplement (doi:10.7554/elife.99858), 2024-08-20
Supplement: fig1-figsupp1-data1 [file elife-99858-fig1-figsupp1-data1-v1.zip]

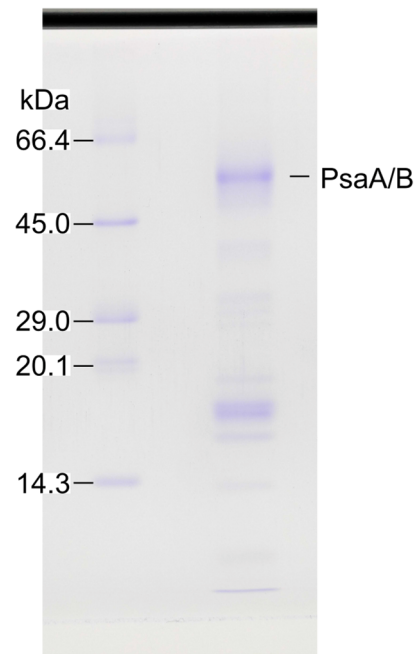

**Figure 1—figure supplement 1—source data 1**

Original file corresponding to Figure 1—figure supplement 1B.
